# Supplementary material
Source: publisher figshare collection journal article supplement (https://tandf.figshare.com/ndownloader/files/12288962)
Supplement: Supplementary file 1 [file 12288962]

**Supplementary File**

| **Ion Extended model** | | | **Temperature** | | | | ***AICC* Δi *Wi*** | | |
| --- | --- | --- | --- | --- | --- | --- | --- | --- | --- |
| **298** | **303 313** | | | **298 303 313 298 303 313 298 303 313** | | |
| **Cs+** | **Langmiur**  **Freundlish**  **R-P** | **Q0,mg/g**  **b, l/mg**  ***RL***  **Kf,mg/g**  **n**  **KR, l/mg**  **α**  **b** | 188.23  0.015  0.0426  4.19  1.37  2.35  0.005  0.999 | | 197.7  0.018  0.035  55.56  1.41  2.36  0.006  0.999 | 211.71  0.011  0.0571  58.02  1.99  2.37  0.007  0.999 | -10.88 104.34 -90.256  111.42 129.87 114.00  -123.52 68.70 -380.35 | -10.89 35.63 290.09  234.94 61.16 494.35   1. 0 0 | 0.995 1.84E-8 1.01E-63  4.14E-54 5.23E-14 4.49E-108  0.004 0.999 1 |
| **Sr2+ Langmiur**  **Freundlish**  **R-P** | | **Q0,mg/g**  **b, l/mg**  ***RL***  **Kf,mg/g**  **n**  **KR, l/mg**  **α**  **b** | 152.77 155.81 169.44  0.008 0.008 0.001  0.0769 0.0769 0.0204  2.52 48.95 51.72  1.34 1.37 1.92  1.78 1.89 2.08  0.003 0.006 0.007  1.096 1.24 1.25 | | | | -35.12 43.04 -102.77  99.37 105.48 110.62   - 1. 76.84 -30.17 | 0 0 0  134.49 62.43 213.38  125.43 33.69 72.59 | 1 1 1    6.23E-30 2.78E-14 4.61E-47  5.788E-28 4.83E-8 1.72E-16 |

**Table S1. The calculated parameters of Langmiur; Freundlish and R-P isotherm models for Cs+ and Sr2+ sorbed onto the prepared material at different temperatures**

**Table S2. Physico-chemical properties of Cs+ and Sr2+**

| **Characteristics of ions** | **Cs+** | **Sr2+** |
| --- | --- | --- |
| **Atomic Weight** | 132.91 | 87.62 |
| **Ionic radius r(pm)** | 167 | 112 |
| **Electronegativity (Pauling) , Xm** | 0.79 | 0.95 |
| **Covalent index , Xm2r-1** | 1.042 | 0.805 |
| **Ionic index, *z*2r-1** | 0.598 | 3.57 |

**Fig.S1.** Linear plot of lnk2 versus 1/T.


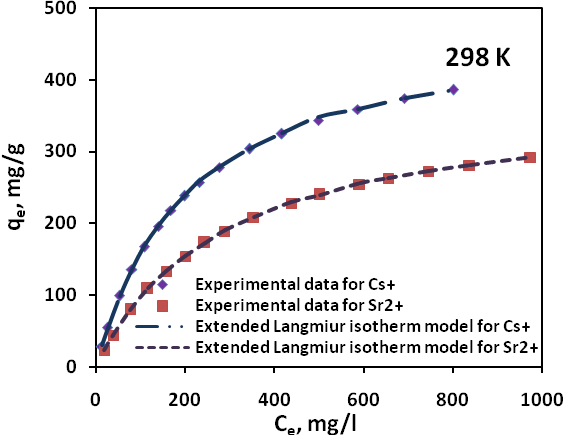

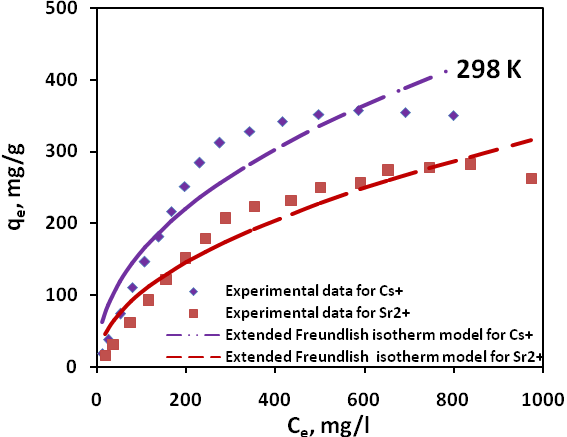

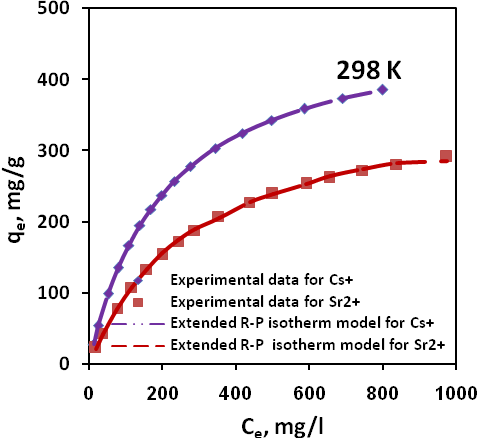


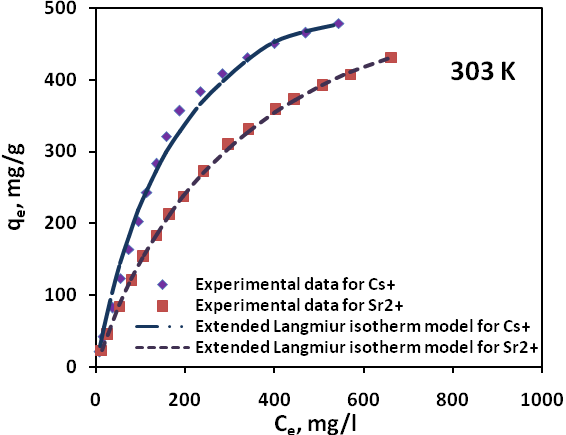

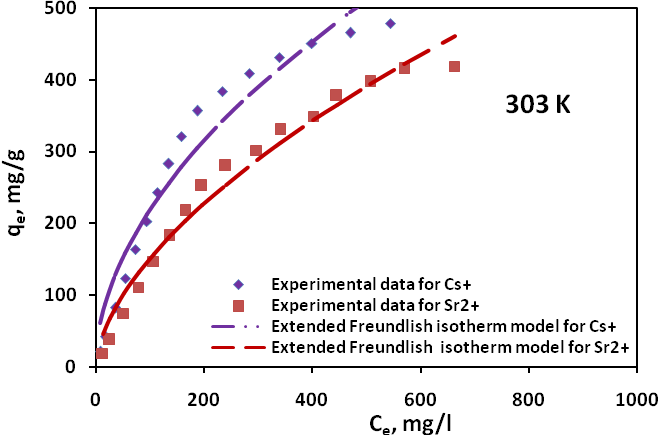

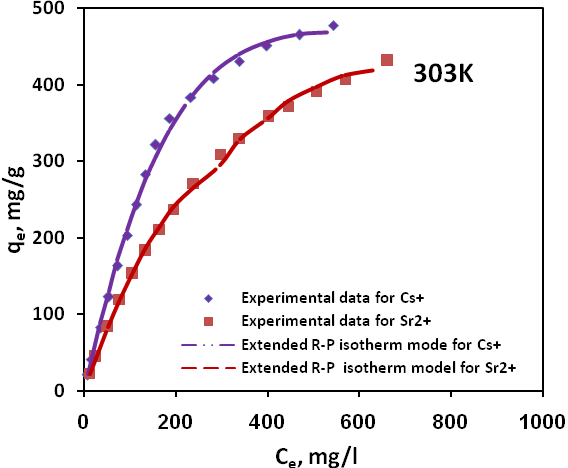


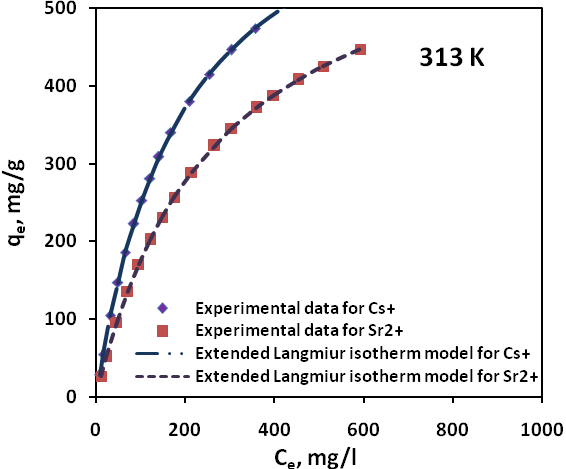

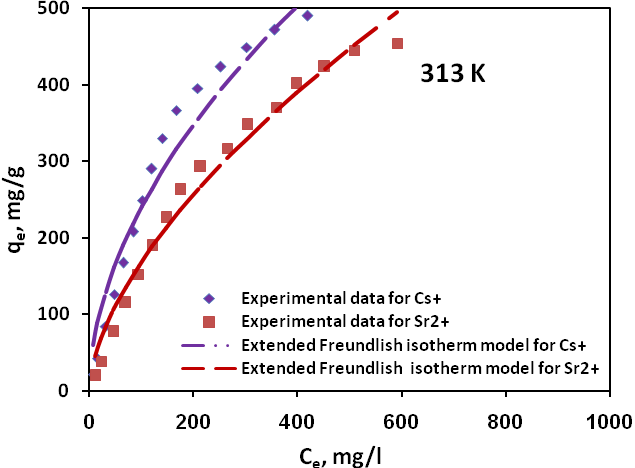

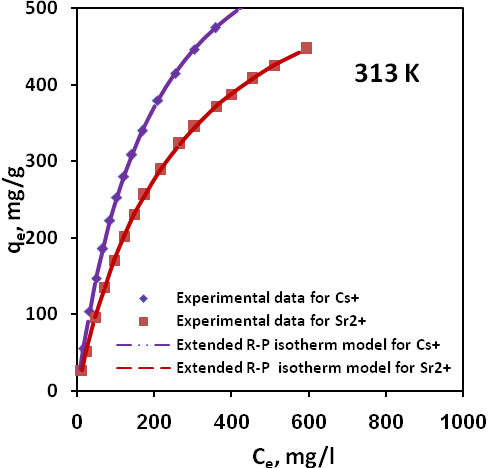


**Fig.S2.** Comparison between experimental and predicted data obtained using the extended Langmuir; Freundlish and R-P model.
